# Supplementary material for: Serum N-glycan profiling is a potential biomarker for castration-resistant prostate cancer
Source: PubMed Central journal article supplement (PMC6856113; doi:10.1038/s41598-019-53384-y), 2019-11-14
Supplement: 41598_2019_53384_MOESM1_ESM.pdf [file 41598_2019_53384_MOESM1_ESM.pdf]

# Serum *N*-glycan profiling is a potential biomarker for castration-resistant prostate cancer

Teppei Matsumoto<sup>1</sup>, Shingo Hatakeyama\*<sup>1</sup>, Tohru Yoneyama<sup>2</sup>, Yuki Tobisawa<sup>1</sup>, Yusuke Ishibashi<sup>1</sup>, Hayato Yamamoto<sup>1</sup>, Takahiro Yoneyama<sup>2</sup>, Yasuhiro Hashimoto<sup>1</sup>, Hiroyuki Ito<sup>3</sup>, Shin-Ichiro Nishimura<sup>4</sup>, Chikara Ohyama<sup>1,2</sup>

<sup>1</sup>Department of Urology, Hirosaki University Graduate School of Medicine, Hirosaki 036-8562, Japan

<sup>2</sup>Department of Advanced Transplant and Regenerative Medicine, Urology, Hirosaki University Graduate School of Medicine, Hirosaki 036-8562, Japan

<sup>3</sup>Department of Urology, Aomori Rosai Hospital, Hachinohe 031-8551, Japan

<sup>4</sup> Graduate School of Life Science, Frontier Research Centre for Advanced Material and Life Science, Hokkaido University, Sapporo 060-0808, Japan

\* Corresponding author: Shingo Hatakeyama, MD

Department of Urology, Hirosaki University Graduate School of Medicine, 5 Zaifu-chou, Hirosaki 036-8562, Japan, Tel: 81-172-39-5091, Fax: 81-172-39-5092, E-mail: [shingoh@hirosaki-u.ac.jp](mailto:shingoh@hirosaki-u.ac.jp)

## Supplementary figure legend

### Fig. S1: A representative structure of serum *N*-glycans

Serum *N*-glycan analysis identified 36 types of benzyloxyamine (BOA)-labeled *N*-glycans that showed quantitative reproducibility in all serum samples.

Fig.S1: A representative structure of serum *N*-glycans (36 types, including isomers)

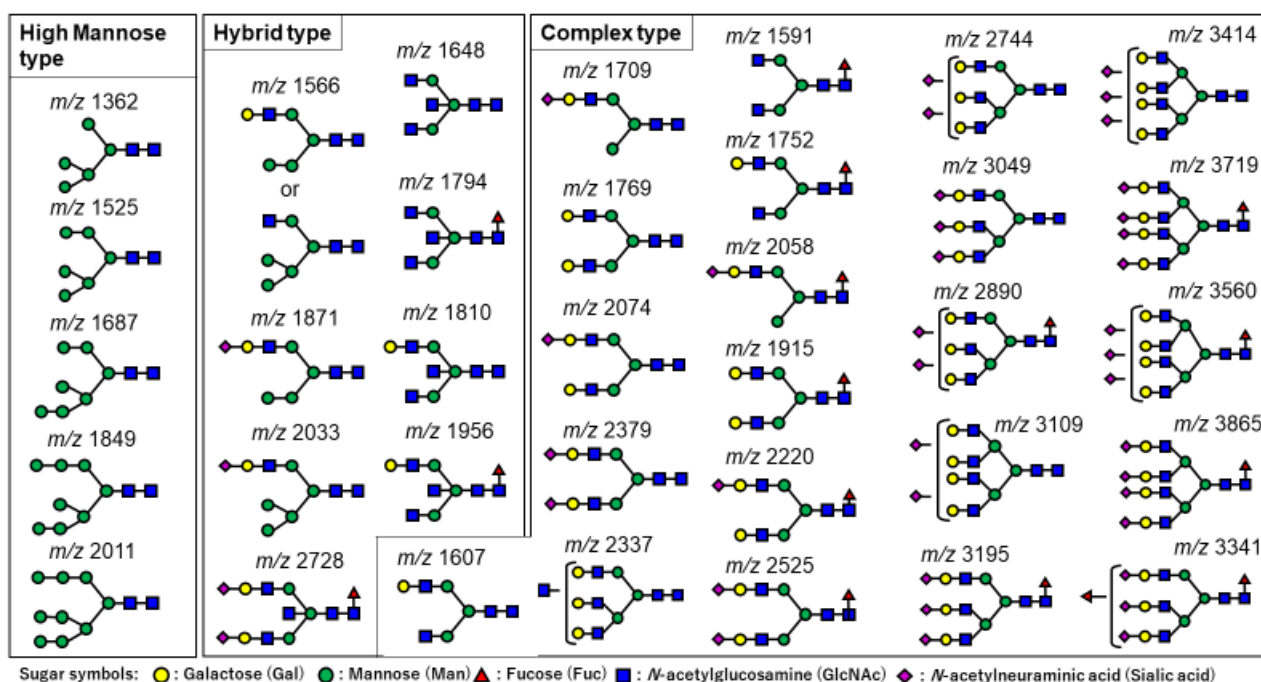

## Supplementary tables

**Table S1: Thirty-Six types of *N*-glycans demonstrated quantitative reproducibility in all samples.**

The *m/z* 2348.9 is the internal standard, disialo-galactosylated biantennary *N*-glycan, that contains amidated sialic acids (A2 amide glycans). Compositional annotations and putative structures are shown as abbreviations.

| Peak No.  | <i>m/z</i>    | Composition                                                                                                                  |
|-----------|---------------|------------------------------------------------------------------------------------------------------------------------------|
| 1         | 1362.5        | (Hex) <sub>2</sub> + (Man) <sub>3</sub> (GlcNAc) <sub>2</sub>                                                                |
| 2         | 1524.5        | (Hex) <sub>3</sub> + (Man) <sub>3</sub> (GlcNAc) <sub>2</sub>                                                                |
| 3         | 1565.5        | (Hex) <sub>5</sub> + (HexNAc) <sub>3</sub>                                                                                   |
| 4         | 1590.6        | (HexNAc) <sub>2</sub> (dHex) <sub>1</sub> + (Man) <sub>3</sub> (GlcNAc) <sub>2</sub>                                         |
| 5         | 1606.6        | (Hex) <sub>1</sub> (HexNAc) <sub>2</sub> + (Man) <sub>3</sub> (GlcNAc) <sub>2</sub>                                          |
| 6         | 1647.6        | (HexNAc) <sub>3</sub> + (Man) <sub>3</sub> (GlcNAc) <sub>2</sub>                                                             |
| 7         | 1686.6        | (Hex) <sub>4</sub> + (Man) <sub>3</sub> (GlcNAc) <sub>2</sub>                                                                |
| 8         | 1708.6        | (Hex) <sub>1</sub> (HexNAc) <sub>1</sub> (NeuAc) <sub>1</sub> + (Man) <sub>3</sub> (GlcNAc) <sub>2</sub>                     |
| 9         | 1752.6        | (Hex) <sub>1</sub> (HexNAc) <sub>2</sub> (dHex) <sub>1</sub> + (Man) <sub>3</sub> (GlcNAc) <sub>2</sub>                      |
| 10        | 1768.6        | (Hex) <sub>2</sub> (HexNAc) <sub>2</sub> + (Man) <sub>3</sub> (GlcNAc) <sub>2</sub>                                          |
| 11        | 1793.7        | (HexNAc) <sub>3</sub> (dHex) <sub>1</sub> + (Man) <sub>3</sub> (GlcNAc) <sub>2</sub>                                         |
| 12        | 1809.7        | (Hex) <sub>1</sub> (HexNAc) <sub>3</sub> + (Man) <sub>3</sub> (GlcNAc) <sub>2</sub>                                          |
| 13        | 1848.6        | (Hex) <sub>5</sub> + (Man) <sub>3</sub> (GlcNAc) <sub>2</sub>                                                                |
| 14        | 1870.7        | (Hex) <sub>2</sub> (HexNAc) <sub>1</sub> (NeuAc) <sub>1</sub> + (Man) <sub>3</sub> (GlcNAc) <sub>2</sub>                     |
| 15        | 1914.7        | (Hex) <sub>2</sub> (HexNAc) <sub>2</sub> (dHex) <sub>1</sub> + (Man) <sub>3</sub> (GlcNAc) <sub>2</sub>                      |
| 16        | 1955.7        | (Hex) <sub>1</sub> (HexNAc) <sub>3</sub> (dHex) <sub>1</sub> + (Man) <sub>3</sub> (GlcNAc) <sub>2</sub>                      |
| 17        | 2010.7        | (Hex) <sub>6</sub> + (Man) <sub>3</sub> (GlcNAc) <sub>2</sub>                                                                |
| 18        | 2032.7        | (Hex) <sub>3</sub> (HexNAc) <sub>1</sub> (NeuAc) <sub>1</sub> + (Man) <sub>3</sub> (GlcNAc) <sub>2</sub>                     |
| 19        | 2057.8        | (Hex) <sub>1</sub> (HexNAc) <sub>2</sub> (dHex) <sub>1</sub> (NeuAc) <sub>1</sub> + (Man) <sub>3</sub> (GlcNAc) <sub>2</sub> |
| 20        | 2073.8        | (Hex) <sub>2</sub> (HexNAc) <sub>2</sub> (NeuAc) <sub>1</sub> + (Man) <sub>3</sub> (GlcNAc) <sub>2</sub>                     |
| 21        | 2219.8        | (Hex) <sub>2</sub> (HexNAc) <sub>2</sub> (dHex) <sub>1</sub> (NeuAc) <sub>1</sub> + (Man) <sub>3</sub> (GlcNAc) <sub>2</sub> |
| 22        | 2336.9        | (Hex) <sub>3</sub> (HexNAc) <sub>4</sub> + (Man) <sub>3</sub> (GlcNAc) <sub>2</sub>                                          |
| <b>23</b> | <b>2348.9</b> | <b>Internal standard (BOA-labeled A2 amide)</b>                                                                              |
| 24        | 2378.9        | (Hex) <sub>2</sub> (HexNAc) <sub>2</sub> (NeuAc) <sub>2</sub> + (Man) <sub>3</sub> (GlcNAc) <sub>2</sub>                     |
| 25        | 2524.9        | (Hex) <sub>2</sub> (HexNAc) <sub>2</sub> (dHex) <sub>1</sub> (NeuAc) <sub>2</sub> + (Man) <sub>3</sub> (GlcNAc) <sub>2</sub> |
| 26        | 2727.9        | (Hex) <sub>2</sub> (HexNAc) <sub>3</sub> (dHex) <sub>1</sub> (NeuAc) <sub>2</sub> + (Man) <sub>3</sub> (GlcNAc) <sub>2</sub> |
| 27        | 2743.9        | (Hex) <sub>3</sub> (HexNAc) <sub>3</sub> (NeuAc) <sub>2</sub> + (Man) <sub>3</sub> (GlcNAc) <sub>2</sub>                     |
| 28        | 2890.1        | (Hex) <sub>3</sub> (HexNAc) <sub>3</sub> (dHex) <sub>1</sub> (NeuAc) <sub>2</sub> + (Man) <sub>3</sub> (GlcNAc) <sub>2</sub> |
| 29        | 3049.1        | (Hex) <sub>3</sub> (HexNAc) <sub>3</sub> (NeuAc) <sub>3</sub> + (Man) <sub>3</sub> (GlcNAc) <sub>2</sub>                     |
| 30        | 3109.1        | (Hex) <sub>4</sub> (HexNAc) <sub>4</sub> (NeuAc) <sub>2</sub> + (Man) <sub>3</sub> (GlcNAc) <sub>2</sub>                     |
| 31        | 3195.2        | (Hex) <sub>3</sub> (HexNAc) <sub>3</sub> (dHex) <sub>1</sub> (NeuAc) <sub>3</sub> + (Man) <sub>3</sub> (GlcNAc) <sub>2</sub> |

|    |        |                                                            |
|----|--------|------------------------------------------------------------|
| 32 | 3341.2 | (Hex)3 (HexNAc)3 (Deoxyhexose)2 (NeuAc)3 + (Man)3(GlcNAc)2 |
| 33 | 3414.2 | (Hex)4(HexNAc)4(NeuAc)3 + (Man)3(GlcNAc)2                  |
| 34 | 3560.3 | (Hex)4(HexNAc)4(dHex)1(NeuAc)3 + (Man)3(GlcNAc)2           |
| 35 | 3719.3 | (Hex)4(HexNAc)4(NeuAc)4 + (Man)3(GlcNAc)2                  |
| 36 | 3865.4 | (Hex)4(HexNAc)4(dHex)1(NeuAc)4 + (Man)3(GlcNAc)2           |

---

Hex: hexose; HexNAc: *N*-acetylhexosamine; dHex: deoxyhexose.

**Table S2 Comparison of serum N-glycans between non-CRPC and CRPC ( †,  $P < 0.001$ )**

| <b>m/z</b>              | <b>non-CRPC</b> | <b>CRPC</b> | <b><i>P value</i></b> |
|-------------------------|-----------------|-------------|-----------------------|
| <b>1362</b>             | 1.624           | 1.570       | <i>0.539</i>          |
| <b>1525</b>             | 1.445           | 1.513       | <i>0.356</i>          |
| <b>1566</b>             | 2.072           | 1.929       | <i>0.297</i>          |
| <b>1591</b>             | 2.618           | 2.393       | <i>0.774</i>          |
| <b>1607</b>             | 2.520           | 2.388       | <i>0.764</i>          |
| <b>1648</b>             | 2.071           | 2.225       | <i>0.161</i>          |
| <b>1687</b>             | 1.349           | 1.464       | <i>0.002</i>          |
| <b>1709</b>             | 1.434           | 1.563       | <i>0.009</i>          |
| <b>1753</b>             | 2.104           | 1.966       | <i>0.191</i>          |
| <b>1769</b>             | 2.317           | 2.262       | <i>0.318</i>          |
| <b>1794</b>             | 2.856           | 3.090       | <i>0.280</i>          |
| <b>1810</b>             | 2.009           | 2.206       | <i>0.341</i>          |
| <b>1849</b>             | 1.463           | 1.525       | <i>0.136</i>          |
| <b>1871<sup>†</sup></b> | 1.666           | 2.041       | <i>&lt;0.001</i>      |
| <b>1915</b>             | 2.113           | 1.969       | <i>0.853</i>          |
| <b>1956</b>             | 2.321           | 2.448       | <i>0.398</i>          |
| <b>2011</b>             | 1.512           | 1.549       | <i>0.011</i>          |
| <b>2033</b>             | 1.615           | 1.781       | <i>0.012</i>          |
| <b>2058</b>             | 2.282           | 2.271       | <i>0.975</i>          |
| <b>2074</b>             | 1.399           | 1.494       | <i>0.005</i>          |
| <b>2220</b>             | 1.902           | 1.877       | <i>0.809</i>          |
| <b>2337<sup>†</sup></b> | 1.341           | 1.449       | <i>&lt;0.001</i>      |
| <b>2379</b>             | 1.361           | 1.459       | <i>0.007</i>          |
| <b>2525</b>             | 1.626           | 1.708       | <i>0.009</i>          |
| <b>2728</b>             | 1.871           | 1.846       | <i>0.743</i>          |
| <b>2744<sup>†</sup></b> | 1.374           | 1.967       | <i>&lt;0.001</i>      |
| <b>2890<sup>†</sup></b> | 1.419           | 1.891       | <i>&lt;0.001</i>      |
| <b>3049<sup>†</sup></b> | 1.382           | 1.879       | <i>&lt;0.001</i>      |
| <b>3109<sup>†</sup></b> | 1.257           | 1.874       | <i>&lt;0.001</i>      |
| <b>3195<sup>†</sup></b> | 1.374           | 1.782       | <i>&lt;0.001</i>      |
| <b>3341</b>             | 0.000           | 0.741       | <i>0.033</i>          |
| <b>3414<sup>†</sup></b> | 1.218           | 1.803       | <i>&lt;0.001</i>      |
| <b>3560</b>             | 1.156           | 1.425       | <i>0.013</i>          |
| <b>3719<sup>†</sup></b> | 1.168           | 1.617       | <i>&lt;0.001</i>      |
| <b>3865</b>             | 1.010           | 1.212       | <i>0.011</i>          |

**Table S3 Comparison of serum N-glycans on immunoglobulins (Igs) between non-CRPC and CRPC ( †,  $P < 0.001$ , N/A: not applicable)**

| <b>m/z (Igs)</b>        | <b>non-CRPC</b> | <b>CRPC</b> | <b><i>P value</i></b> |
|-------------------------|-----------------|-------------|-----------------------|
| <b>1362</b>             | 0.688           | 0.418       | <i>0.008</i>          |
| <b>1525</b>             | 0.363           | 0.304       | <i>0.024</i>          |
| <b>1566</b>             | 0.000           | 0.000       | <i>N/A</i>            |
| <b>1591</b>             | 4.531           | 2.807       | <i>0.012</i>          |
| <b>1607</b>             | 3.166           | 1.821       | <i>0.002</i>          |
| <b>1648</b>             | 2.188           | 1.512       | <i>0.015</i>          |
| <b>1687</b>             | 0.000           | 0.000       | <i>0.050</i>          |
| <b>1709<sup>†</sup></b> | 0.556           | 0.414       | <i>&lt;0.001</i>      |
| <b>1753</b>             | 2.804           | 1.919       | <i>0.009</i>          |
| <b>1769</b>             | 0.000           | 0.000       | <i>0.036</i>          |
| <b>1794</b>             | 4.962           | 2.851       | <i>0.014</i>          |
| <b>1810</b>             | 1.774           | 1.245       | <i>0.013</i>          |
| <b>1849</b>             | 0.681           | 0.353       | <i>0.004</i>          |
| <b>1871<sup>†</sup></b> | 1.113           | 0.740       | <i>&lt;0.001</i>      |
| <b>1915</b>             | 2.637           | 1.710       | <i>0.019</i>          |
| <b>1956</b>             | 2.970           | 1.785       | <i>0.008</i>          |
| <b>2011</b>             | 0.966           | 0.602       | <i>0.006</i>          |
| <b>2033<sup>†</sup></b> | 0.544           | 0.000       | <i>&lt;0.001</i>      |
| <b>2058<sup>†</sup></b> | 2.039           | 1.699       | <i>&lt;0.001</i>      |
| <b>2074<sup>†</sup></b> | 0.518           | 0.358       | <i>&lt;0.001</i>      |
| <b>2220<sup>†</sup></b> | 1.159           | 0.959       | <i>&lt;0.001</i>      |
| <b>2337</b>             | 0.515           | 0.454       | <i>0.010</i>          |
| <b>2379<sup>†</sup></b> | 0.266           | 0.203       | <i>&lt;0.001</i>      |
| <b>2525<sup>†</sup></b> | 0.572           | 0.478       | <i>&lt;0.001</i>      |
| <b>2728</b>             | 0.918           | 0.774       | <i>0.003</i>          |
| <b>2744</b>             | 0.557           | 0.489       | <i>0.002</i>          |
| <b>2890</b>             | 0.000           | 0.440       | <i>0.397</i>          |
| <b>3049</b>             | 0.305           | 0.286       | <i>0.152</i>          |
| <b>3109</b>             | 0.000           | 0.000       | <i>0.667</i>          |
| <b>3195</b>             | 0.407           | 0.350       | <i>0.902</i>          |
| <b>3341-3865</b>        | 0.000           | 0.000       | <i>N/A</i>            |
